# Supplementary material for: Leveraging electronic health records to identify risk factors for recurrent pregnancy loss across two medical centers: a case-control study
Source: Research Square preprint supplement (doi:10.21203/rs.3.rs-2631220/v2), 2023-03-31
Supplement: Supplementary file 1 [file d8cc84c2d051359c00577221.pdf]

|                                           | RPL               | Control           | Total             | P-value |
|-------------------------------------------|-------------------|-------------------|-------------------|---------|
|                                           | (N=4656)          | (N=36019)         | (N=40675)         |         |
| <b>Age</b>                                |                   |                   |                   |         |
| Mean (SD)                                 | 35.1 (4.86)       | 31.9 (5.46)       | 32.2 (5.49)       | <0.001  |
| Median [Min, Max]                         | 35.4 [17.1, 44.0] | 32.4 [15.0, 44.0] | 32.8 [15.0, 44.0] |         |
| <b>Race</b>                               |                   |                   |                   |         |
| American Indian or Alaska Native          | 16 (0.3%)         | 118 (0.3%)        | 134 (0.3%)        | <0.001  |
| Asian                                     | 1600 (34.4%)      | 11198 (31.1%)     | 12798 (31.5%)     |         |
| Black or African American                 | 143 (3.1%)        | 1039 (2.9%)       | 1182 (2.9%)       |         |
| Native Hawaiian or Other Pacific Islander | 75 (1.6%)         | 713 (2.0%)        | 788 (1.9%)        |         |
| No matching concept                       | 982 (21.1%)       | 8779 (24.4%)      | 9761 (24.0%)      |         |
| White                                     | 1840 (39.5%)      | 14172 (39.3%)     | 16012 (39.4%)     |         |
| <b>Ethnicity</b>                          |                   |                   |                   |         |
| Hispanic or Latino                        | 763 (16.4%)       | 10552 (29.3%)     | 11315 (27.8%)     | <0.001  |
| No matching concept                       | 243 (5.2%)        | 757 (2.1%)        | 1000 (2.5%)       |         |
| Not Hispanic or Latino                    | 3650 (78.4%)      | 24710 (68.6%)     | 28360 (69.7%)     |         |
| <b>Number of visits (in study)</b>        |                   |                   |                   |         |
| Mean (SD)                                 | 44.3 (46.3)       | 23.6 (29.6)       | 26.0 (32.6)       | <0.001  |
| Median [Min, Max]                         | 31.0 [0, 544]     | 14.0 [0, 1030]    | 16.0 [0, 1030]    |         |
| <b>Years in EHR (in study)</b>            |                   |                   |                   |         |
| Mean (SD)                                 | 4.97 (4.65)       | 4.55 (4.84)       | 4.59 (4.82)       | <0.001  |
| Median [Min, Max]                         | 3.14 [0, 23.4]    | 1.67 [0, 23.6]    | 1.83 [0, 23.6]    |         |
| <b>Number of diagnoses (in study)</b>     |                   |                   |                   |         |
| Mean (SD)                                 | 15.8 (15.7)       | 12.2 (11.1)       | 12.6 (11.8)       | <0.001  |
| Median [Min, Max]                         | 11.0 [1.00, 202]  | 9.00 [1.00, 216]  | 9.00 [1.00, 216]  |         |

Supplementary Table 1: Patient demographics and healthcare utilization at Stanford. *P*-values were computed using chi-squared tests for categorical variables and t tests for numeric variables.

|                                           | RPL                | Control            | Total              | P-value |
|-------------------------------------------|--------------------|--------------------|--------------------|---------|
|                                           | (N=1401)           | (N=11012)          | (N=12413)          |         |
| <b>Age</b>                                |                    |                    |                    |         |
| Mean (SD)                                 | 31.5 (3.24)        | 30.2 (4.06)        | 30.3 (4.00)        | <0.001  |
| Median [Min, Max]                         | 32.4 [16.6, 35.0]  | 31.4 [15.1, 35.0]  | 31.5 [15.1, 35.0]  |         |
| <b>Race</b>                               |                    |                    |                    |         |
| American Indian or Alaska Native          | 17 (1.2%)          | 64 (0.6%)          | 81 (0.7%)          | <0.001  |
| Asian                                     | 259 (18.5%)        | 2386 (21.7%)       | 2645 (21.3%)       |         |
| Black or African American                 | 97 (6.9%)          | 699 (6.3%)         | 796 (6.4%)         |         |
| Native Hawaiian or Other Pacific Islander | 7 (0.5%)           | 82 (0.7%)          | 89 (0.7%)          |         |
| Other Race                                | 243 (17.3%)        | 2414 (21.9%)       | 2657 (21.4%)       |         |
| Unknown                                   | 144 (10.3%)        | 679 (6.2%)         | 823 (6.6%)         |         |
| White                                     | 634 (45.3%)        | 4688 (42.6%)       | 5322 (42.9%)       |         |
| <b>Ethnicity</b>                          |                    |                    |                    |         |
| Hispanic or Latino                        | 195 (13.9%)        | 2066 (18.8%)       | 2261 (18.2%)       | <0.001  |
| Not Hispanic or Latino                    | 1073 (76.6%)       | 8200 (74.5%)       | 9273 (74.7%)       |         |
| Unknown                                   | 133 (9.5%)         | 746 (6.8%)         | 879 (7.1%)         |         |
| <b>Number of visits (in study)</b>        |                    |                    |                    |         |
| Mean (SD)                                 | 58.2 (80.2)        | 47.4 (48.0)        | 48.6 (52.8)        | <0.001  |
| Median [Min, Max]                         | 36.0 [1.00, 1700]  | 37.0 [1.00, 1230]  | 37.0 [1.00, 1700]  |         |
| <b>Years in EHR (in study)</b>            |                    |                    |                    |         |
| Mean (SD)                                 | 5.16 (6.62)        | 4.59 (5.98)        | 4.65 (6.05)        | 0.00229 |
| Median [Min, Max]                         | 2.37 [0.225, 44.4] | 1.69 [0.132, 38.9] | 1.77 [0.132, 44.4] |         |
| <b>Number of diagnoses (in study)</b>     |                    |                    |                    |         |
| Mean (SD)                                 | 13.6 (16.0)        | 14.1 (11.3)        | 14.0 (11.9)        | 0.303   |
| Median [Min, Max]                         | 8.00 [1.00, 202]   | 12.0 [1.00, 186]   | 12.0 [1.00, 202]   |         |

Supplementary Table 2: Patient demographics and healthcare utilization for the <35 stratum in the UCSF age-stratified analysis. *P*-values were computed using chi-squared tests for categorical variables and t tests for continuous variables.

|                                           | RPL<br>(N=2439)    | Control<br>(N=6247) | Total<br>(N=8686)  | P-value |
|-------------------------------------------|--------------------|---------------------|--------------------|---------|
| <b>Age</b>                                |                    |                     |                    |         |
| Mean (SD)                                 | 38.9 (2.41)        | 37.9 (2.15)         | 38.2 (2.28)        | <0.001  |
| Median [Min, Max]                         | 38.9 [35.0, 44.0]  | 37.4 [35.0, 44.0]   | 37.7 [35.0, 44.0]  |         |
| <b>Race</b>                               |                    |                     |                    |         |
| American Indian or Alaska Native          | 16 (0.7%)          | 22 (0.4%)           | 38 (0.4%)          | <0.001  |
| Asian                                     | 566 (23.2%)        | 1486 (23.8%)        | 2052 (23.6%)       |         |
| Black or African American                 | 83 (3.4%)          | 179 (2.9%)          | 262 (3.0%)         |         |
| Native Hawaiian or Other Pacific Islander | 19 (0.8%)          | 63 (1.0%)           | 82 (0.9%)          |         |
| Other Race                                | 327 (13.4%)        | 987 (15.8%)         | 1314 (15.1%)       |         |
| Unknown                                   | 222 (9.1%)         | 364 (5.8%)          | 586 (6.7%)         |         |
| White                                     | 1206 (49.4%)       | 3146 (50.4%)        | 4352 (50.1%)       |         |
| <b>Ethnicity</b>                          |                    |                     |                    |         |
| Hispanic or Latino                        | 255 (10.5%)        | 803 (12.9%)         | 1058 (12.2%)       | <0.001  |
| Not Hispanic or Latino                    | 1949 (79.9%)       | 5066 (81.1%)        | 7015 (80.8%)       |         |
| Unknown                                   | 235 (9.6%)         | 378 (6.1%)          | 613 (7.1%)         |         |
| <b>Number of visits (in study)</b>        |                    |                     |                    |         |
| Mean (SD)                                 | 72.6 (79.0)        | 63.2 (57.6)         | 65.9 (64.5)        | <0.001  |
| Median [Min, Max]                         | 48.0 [1.00, 1110]  | 50.0 [1.00, 635]    | 49.0 [1.00, 1110]  |         |
| <b>Years in EHR (in study)</b>            |                    |                     |                    |         |
| Mean (SD)                                 | 6.47 (6.32)        | 5.37 (5.70)         | 5.68 (5.90)        | <0.001  |
| Median [Min, Max]                         | 4.15 [0.137, 37.7] | 2.74 [0.712, 41.4]  | 3.13 [0.137, 41.4] |         |
| <b>Number of diagnoses (in study)</b>     |                    |                     |                    |         |
| Mean (SD)                                 | 13.7 (14.8)        | 16.9 (12.0)         | 16.0 (12.9)        | <0.001  |
| Median [Min, Max]                         | 9.00 [1.00, 162]   | 14.0 [1.00, 126]    | 13.0 [1.00, 162]   |         |

Supplementary Table 3: Patient demographics and healthcare utilization for the 35+ stratum in the UCSF age-stratified analysis. *P*-values were computed using chi-squared tests for categorical variables and t tests for continuous variables.

|                                           | RPL               | Control           | Total             | P-value |
|-------------------------------------------|-------------------|-------------------|-------------------|---------|
|                                           | (N=2194)          | (N=25343)         | (N=27537)         |         |
| <b>Age</b>                                |                   |                   |                   |         |
| Mean (SD)                                 | 31.0 (3.38)       | 29.4 (4.35)       | 29.5 (4.30)       | <0.001  |
| Median [Min, Max]                         | 31.8 [17.1, 35.0] | 30.5 [15.0, 35.0] | 30.6 [15.0, 35.0] |         |
| <b>Race</b>                               |                   |                   |                   |         |
| American Indian or Alaska Native          | 7 (0.3%)          | 91 (0.4%)         | 98 (0.4%)         | <0.001  |
| Asian                                     | 742 (33.8%)       | 7260 (28.6%)      | 8002 (29.1%)      |         |
| Black or African American                 | 83 (3.8%)         | 826 (3.3%)        | 909 (3.3%)        |         |
| Native Hawaiian or Other Pacific Islander | 37 (1.7%)         | 535 (2.1%)        | 572 (2.1%)        |         |
| No matching concept                       | 503 (22.9%)       | 6894 (27.2%)      | 7397 (26.9%)      |         |
| White                                     | 822 (37.5%)       | 9737 (38.4%)      | 10559 (38.3%)     |         |
| <b>Ethnicity</b>                          |                   |                   |                   |         |
| Hispanic or Latino                        | 439 (20.0%)       | 8364 (33.0%)      | 8803 (32.0%)      | <0.001  |
| No matching concept                       | 106 (4.8%)        | 524 (2.1%)        | 630 (2.3%)        |         |
| Not Hispanic or Latino                    | 1649 (75.2%)      | 16455 (64.9%)     | 18104 (65.7%)     |         |
| <b>Number of visits (in study)</b>        |                   |                   |                   |         |
| Mean (SD)                                 | 39.1 (40.9)       | 21.9 (25.3)       | 23.2 (27.3)       | <0.001  |
| Median [Min, Max]                         | 28.0 [0, 474]     | 14.0 [0, 466]     | 14.0 [0, 474]     |         |
| <b>Years in EHR (in study)</b>            |                   |                   |                   |         |
| Mean (SD)                                 | 4.51 (4.55)       | 4.33 (4.75)       | 4.35 (4.73)       | 0.0746  |
| Median [Min, Max]                         | 2.51 [0, 23.4]    | 1.63 [0, 23.6]    | 1.64 [0, 23.6]    |         |
| <b>Number of diagnoses (in study)</b>     |                   |                   |                   |         |
| Mean (SD)                                 | 15.6 (15.7)       | 11.8 (10.7)       | 12.1 (11.2)       | <0.001  |
| Median [Min, Max]                         | 11.0 [1.00, 202]  | 9.00 [1.00, 188]  | 9.00 [1.00, 202]  |         |

Supplementary Table 4: Patient demographics and healthcare utilization for the <35 stratum in the Stanford age-stratified analysis. *P*-values were computed using chi-squared tests for categorical variables and t tests for continuous variables.

|                                           | RPL               | Control           | Total             | P-value |
|-------------------------------------------|-------------------|-------------------|-------------------|---------|
|                                           | (N=2462)          | (N=10676)         | (N=13138)         |         |
| <b>Age</b>                                |                   |                   |                   |         |
| Mean (SD)                                 | 38.7 (2.44)       | 37.9 (2.15)       | 38.0 (2.24)       | <0.001  |
| Median [Min, Max]                         | 38.5 [35.0, 44.0] | 37.4 [35.0, 44.0] | 37.6 [35.0, 44.0] |         |
| <b>Race</b>                               |                   |                   |                   |         |
| American Indian or Alaska Native          | 9 (0.4%)          | 27 (0.3%)         | 36 (0.3%)         | 0.114   |
| Asian                                     | 858 (34.8%)       | 3938 (36.9%)      | 4796 (36.5%)      |         |
| Black or African American                 | 60 (2.4%)         | 213 (2.0%)        | 273 (2.1%)        |         |
| Native Hawaiian or Other Pacific Islander | 38 (1.5%)         | 178 (1.7%)        | 216 (1.6%)        |         |
| No matching concept                       | 479 (19.5%)       | 1885 (17.7%)      | 2364 (18.0%)      |         |
| White                                     | 1018 (41.3%)      | 4435 (41.5%)      | 5453 (41.5%)      |         |
| <b>Ethnicity</b>                          |                   |                   |                   |         |
| Hispanic or Latino                        | 324 (13.2%)       | 2188 (20.5%)      | 2512 (19.1%)      | <0.001  |
| No matching concept                       | 137 (5.6%)        | 233 (2.2%)        | 370 (2.8%)        |         |
| Not Hispanic or Latino                    | 2001 (81.3%)      | 8255 (77.3%)      | 10256 (78.1%)     |         |
| <b>Number of visits (in study)</b>        |                   |                   |                   |         |
| Mean (SD)                                 | 48.9 (50.1)       | 27.9 (37.5)       | 31.8 (41.0)       | <0.001  |
| Median [Min, Max]                         | 34.0 [0, 544]     | 16.0 [0, 1030]    | 18.0 [0, 1030]    |         |
| <b>Years in EHR (in study)</b>            |                   |                   |                   |         |
| Mean (SD)                                 | 5.37 (4.70)       | 5.06 (5.04)       | 5.12 (4.98)       | 0.00311 |
| Median [Min, Max]                         | 3.85 [0, 23.4]    | 2.32 [0, 23.5]    | 2.60 [0, 23.5]    |         |
| <b>Number of diagnoses (in study)</b>     |                   |                   |                   |         |
| Mean (SD)                                 | 16.1 (15.7)       | 13.2 (12.0)       | 13.7 (12.8)       | <0.001  |
| Median [Min, Max]                         | 11.0 [1.00, 169]  | 10.0 [1.00, 216]  | 10.0 [1.00, 216]  |         |

Supplementary Table 5: Patient demographics and healthcare utilization for the 35+ stratum in the Stanford age-stratified analysis. *P*-values were computed using chi-squared tests for categorical variables and t tests for continuous variables.

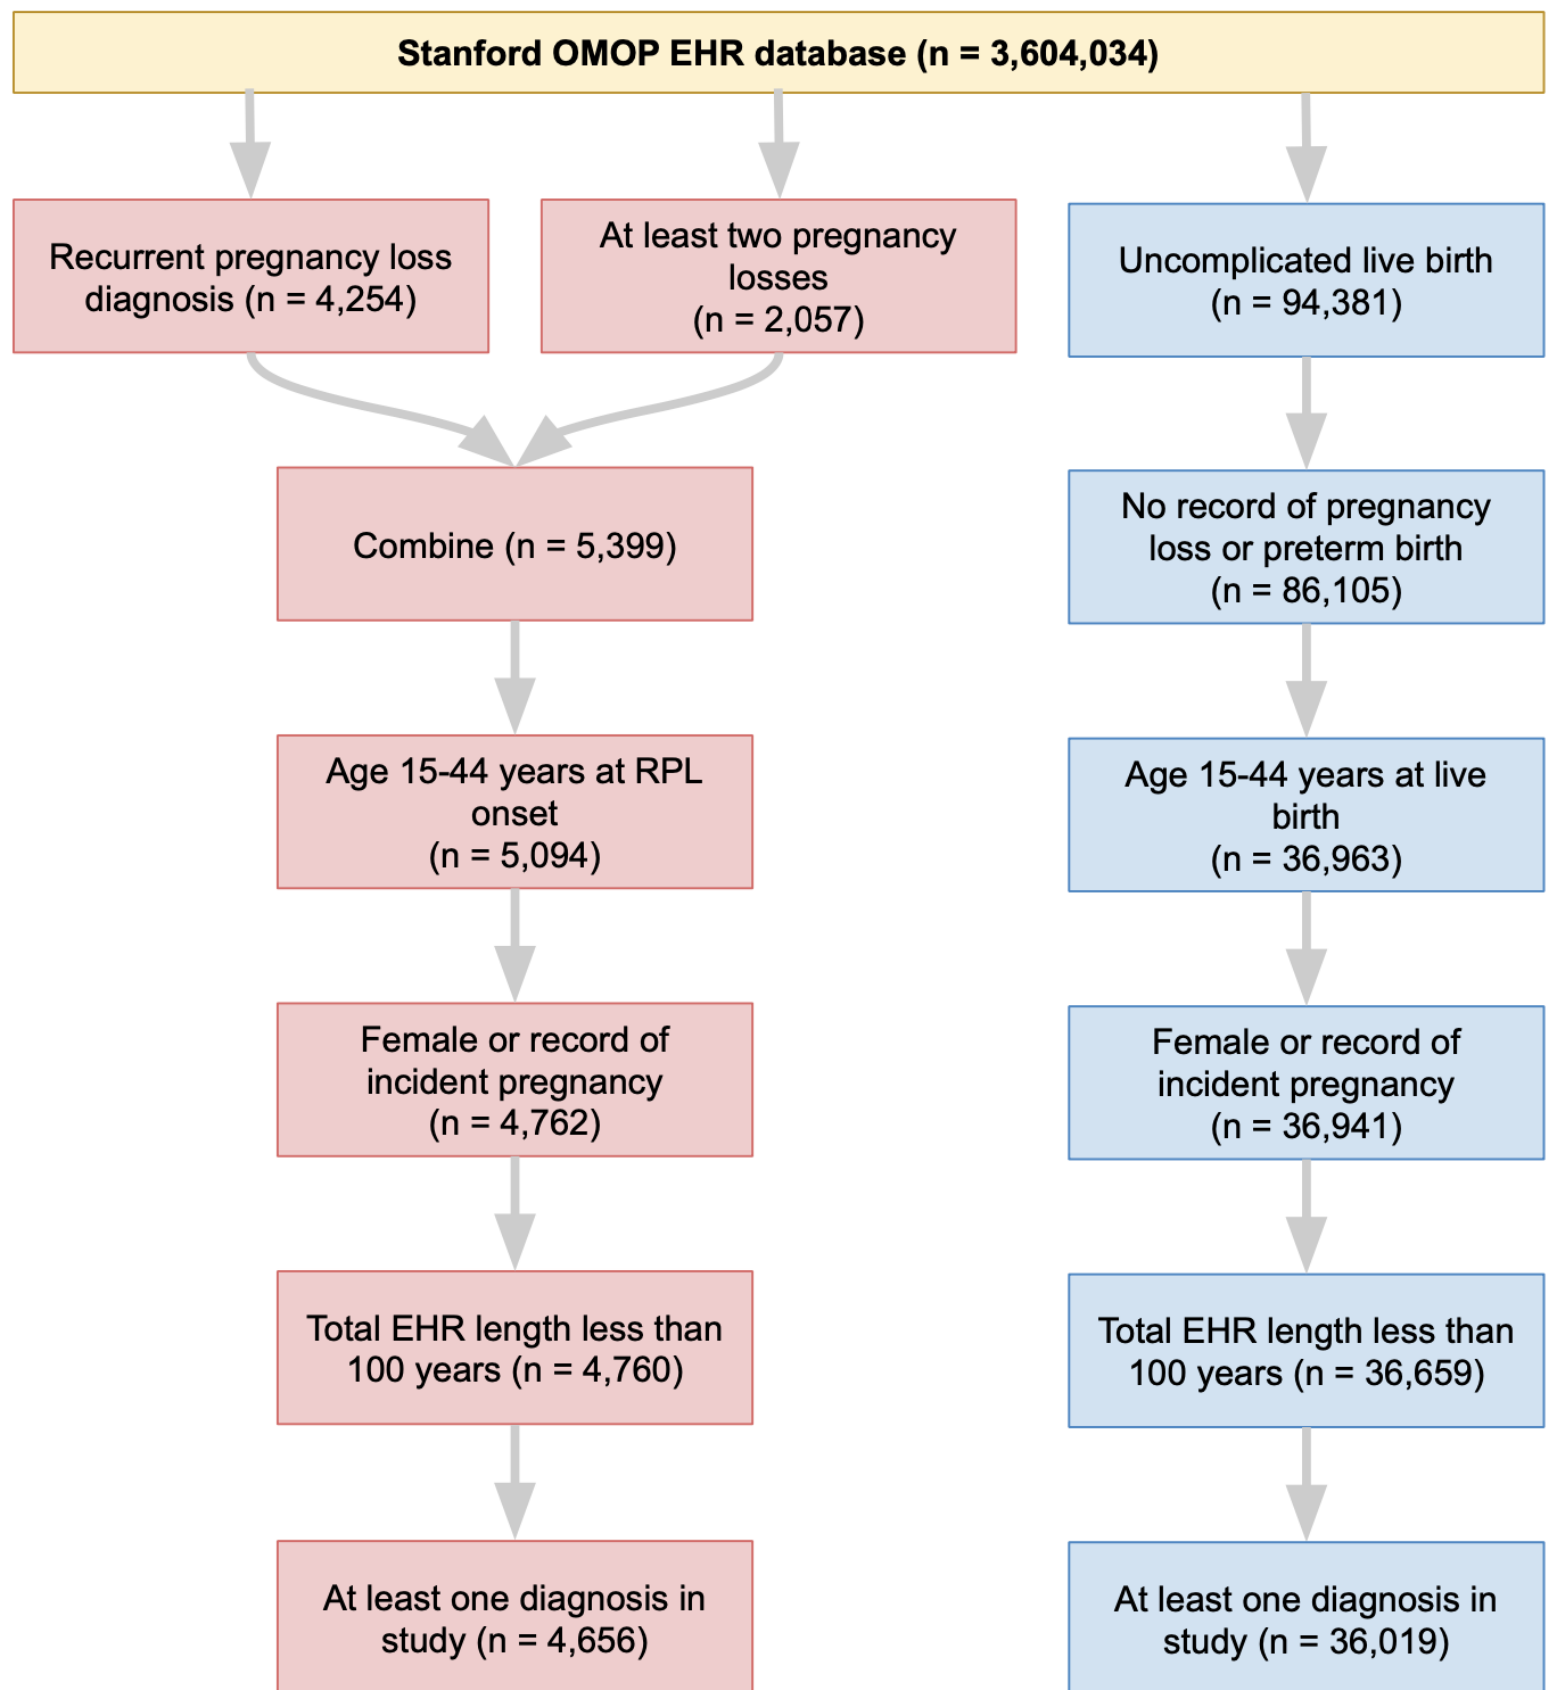

Supplementary Figure 1: Patient selection at Stanford. In total, 4,656 RPL patients were selected (red) and 36,019 Control patients were selected (blue).

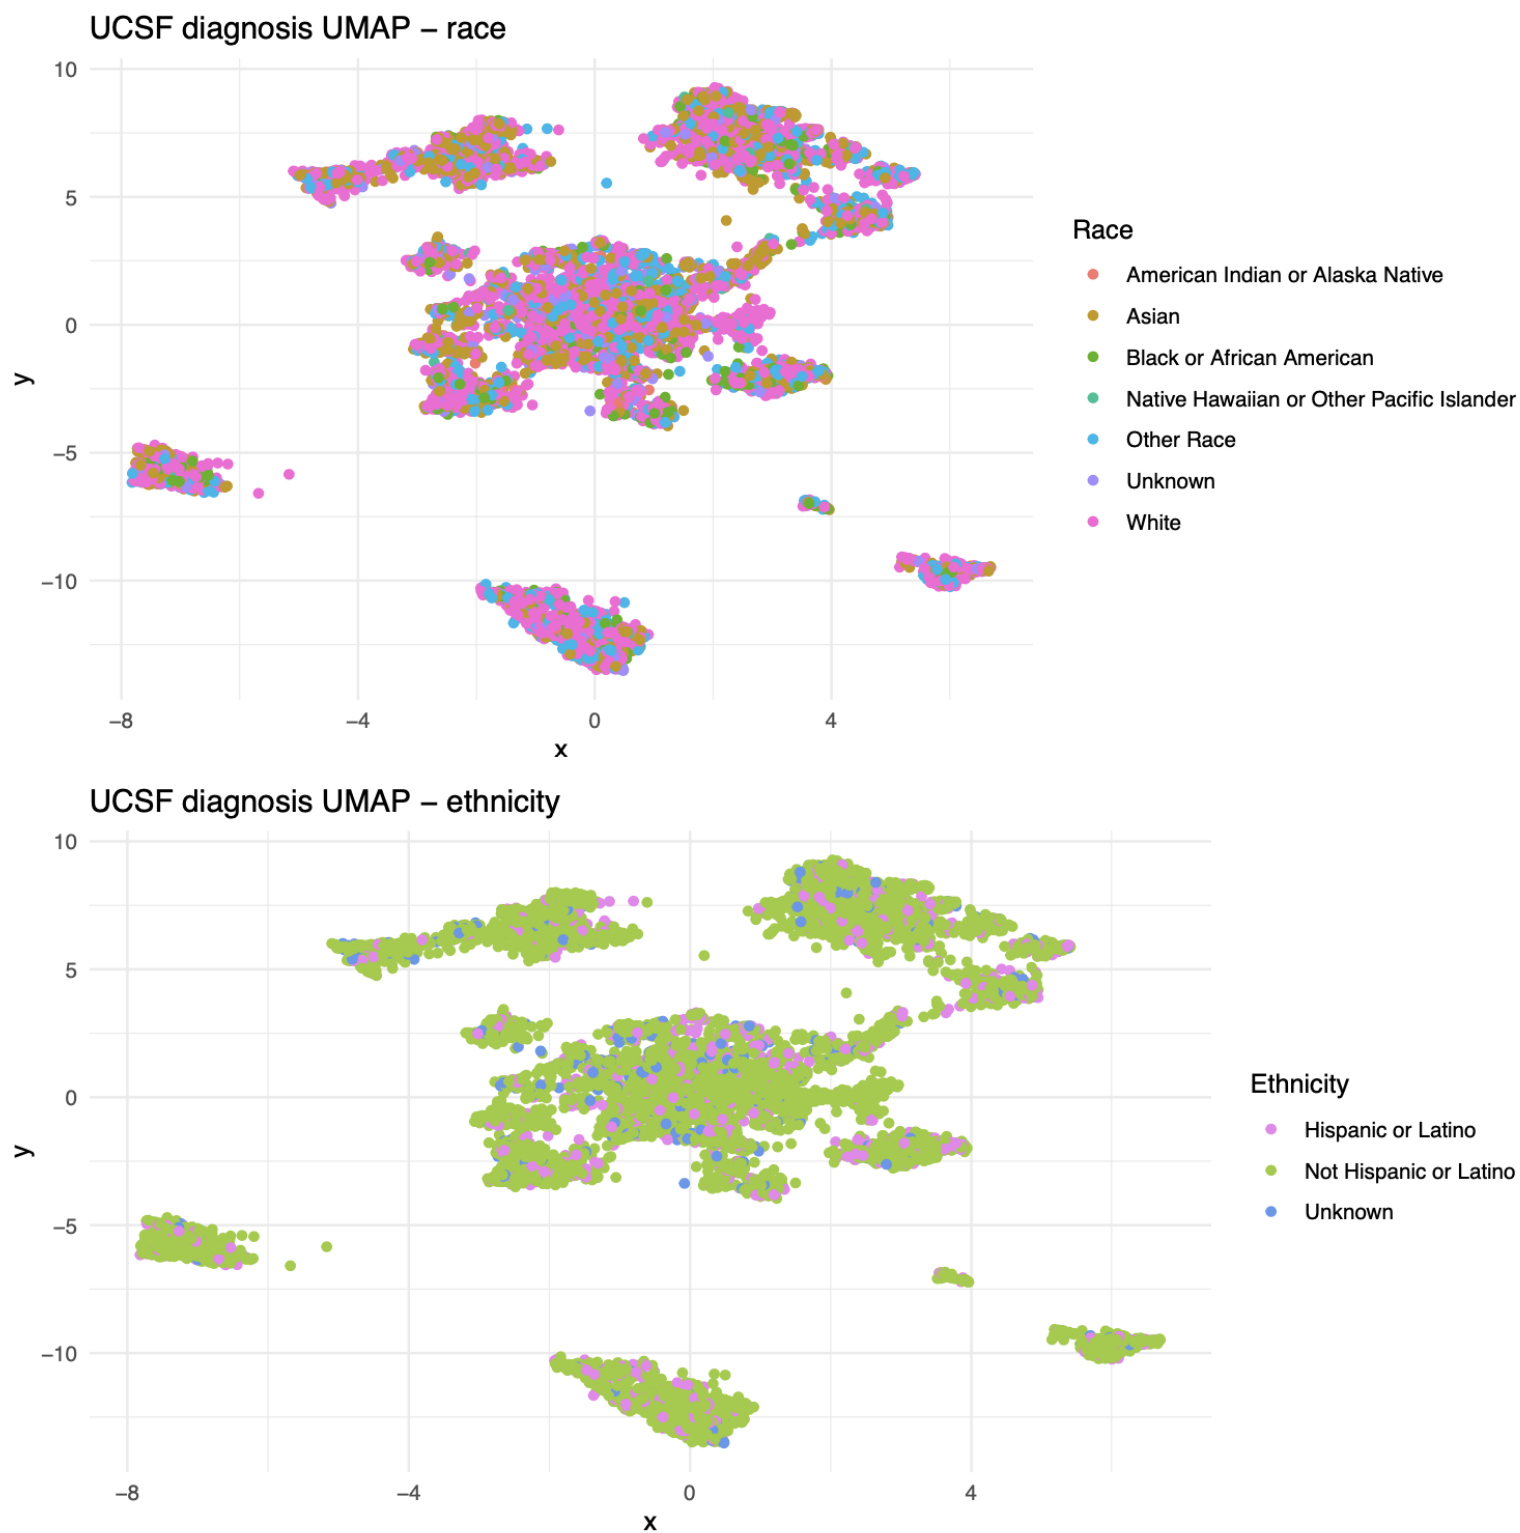

Supplementary Figure 2: UCSF diagnosis UMAPs colored by: **(a)** race and **(b)** ethnicity.

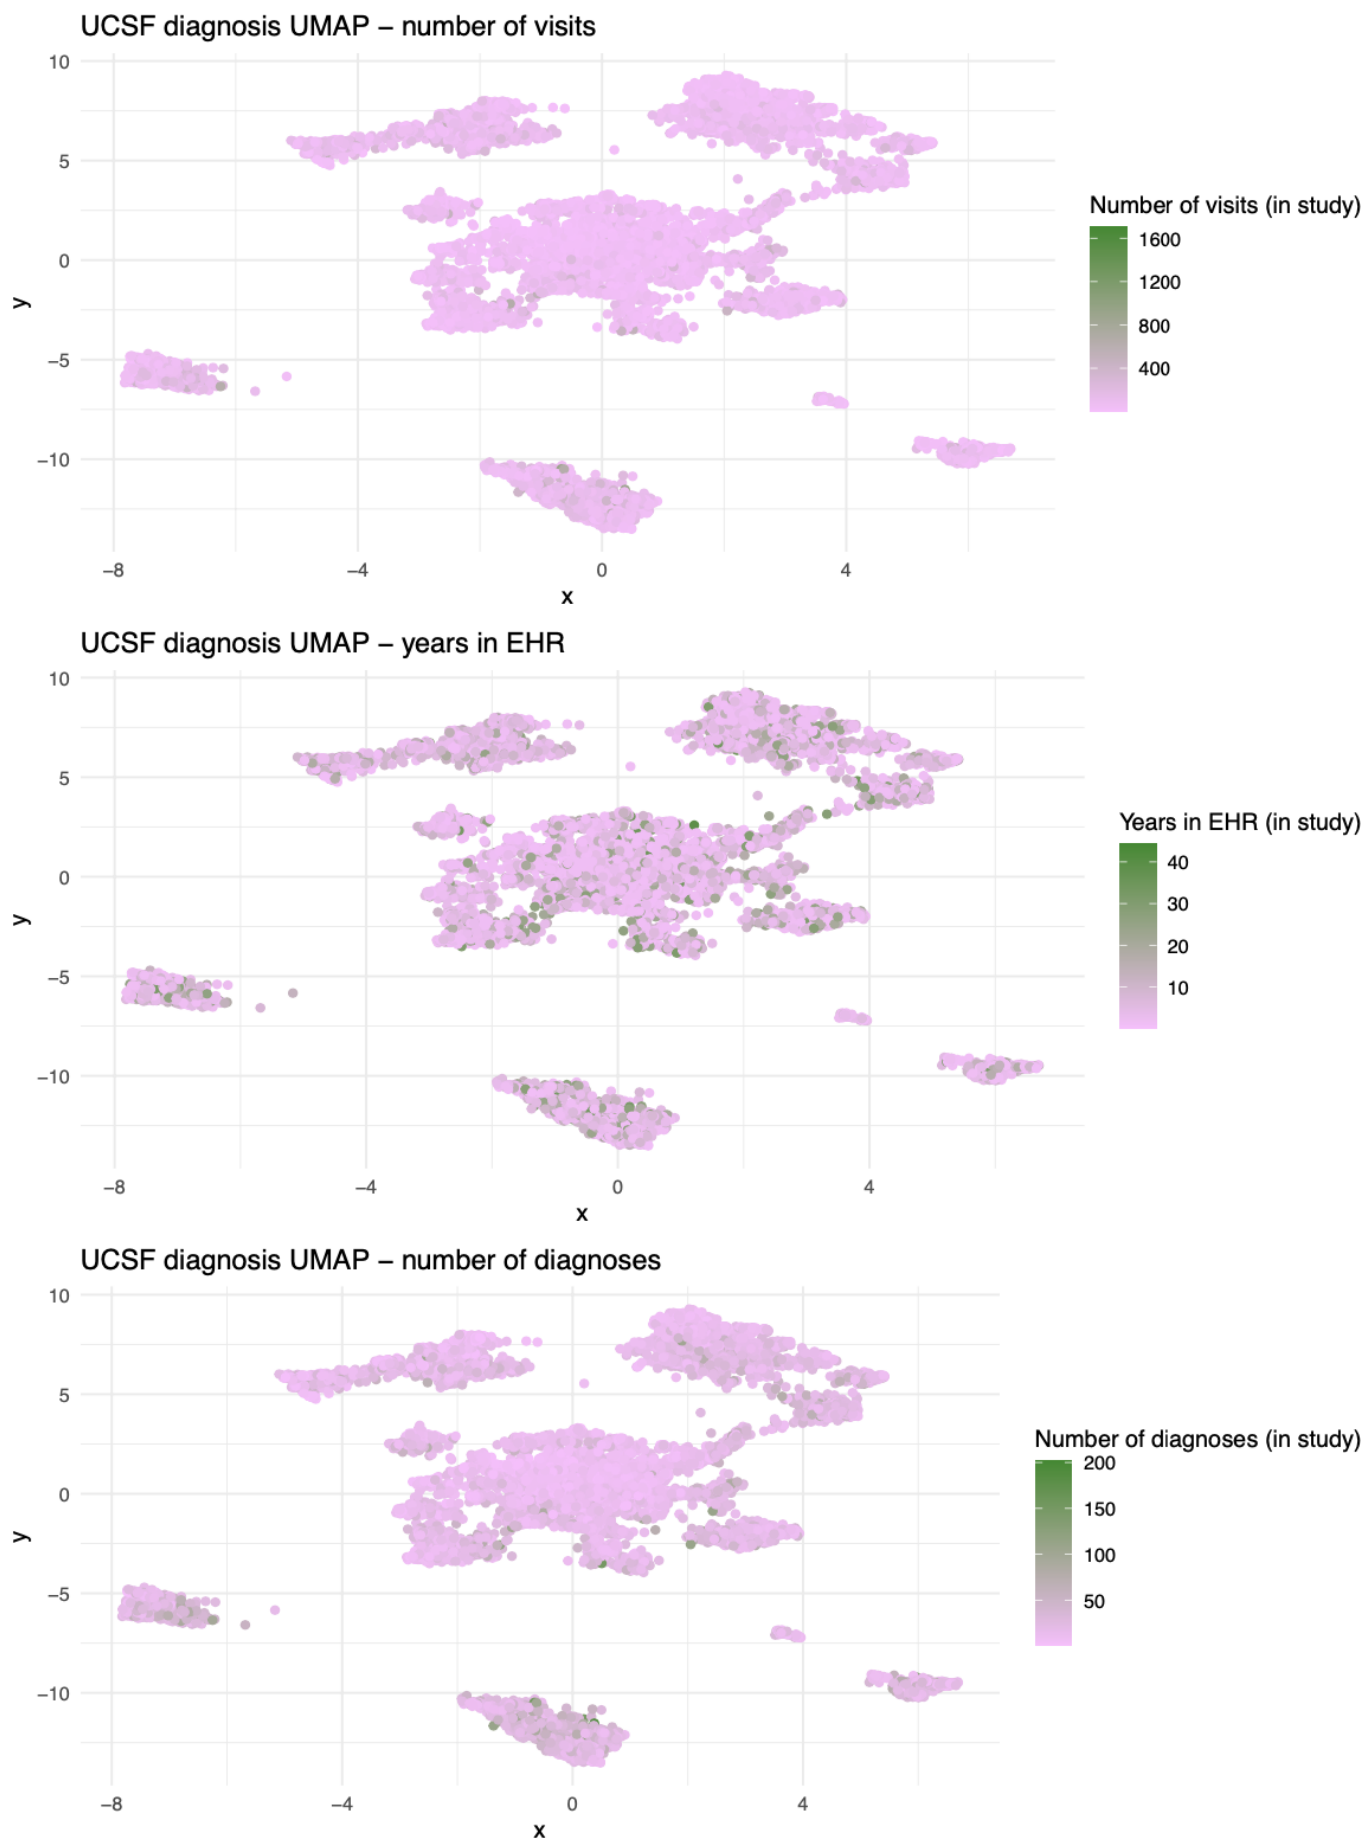

Supplementary Figure 3: UCSF diagnosis UMAPs colored by: **(a)** years in EHR, **(b)** number of visits, and **(c)** number of diagnoses.



Stanford diagnosis UMAP – race

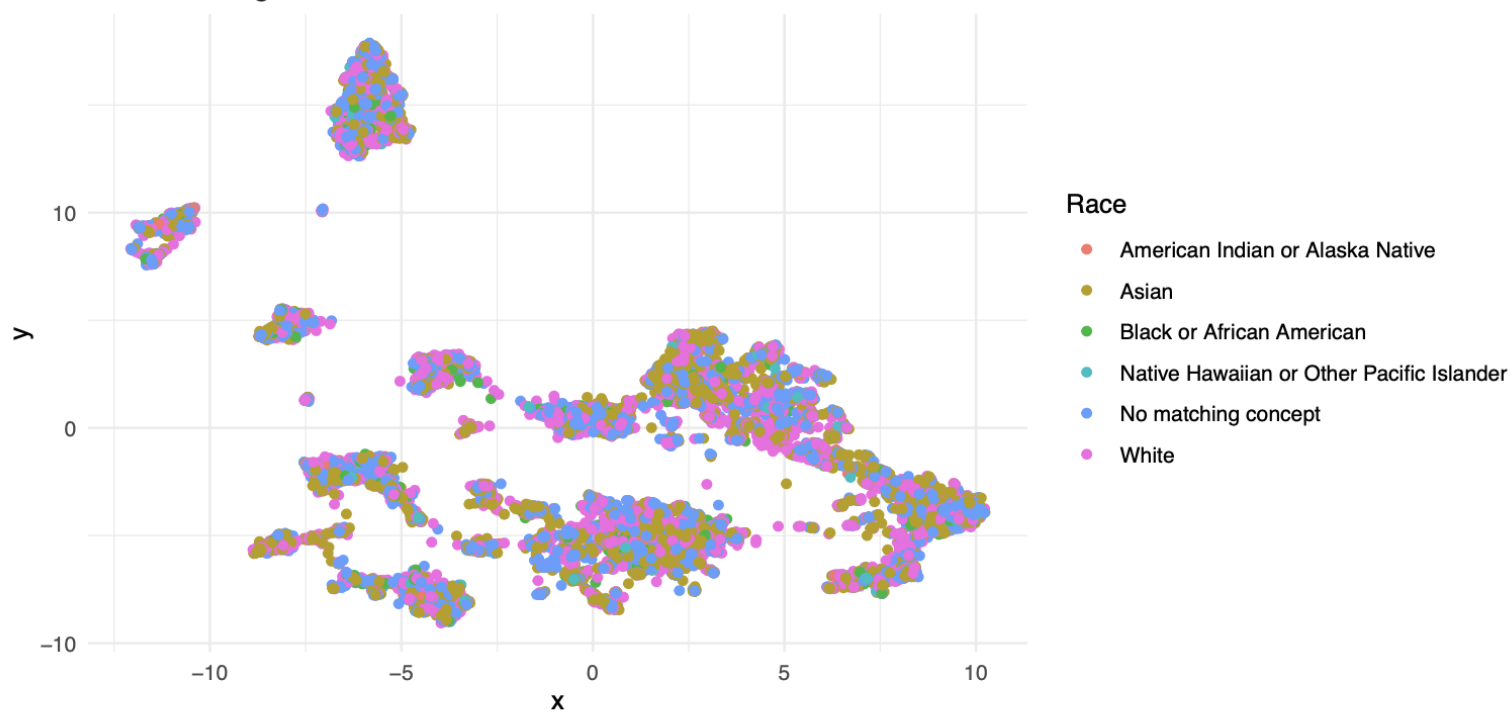

Stanford diagnosis UMAP – ethnicity

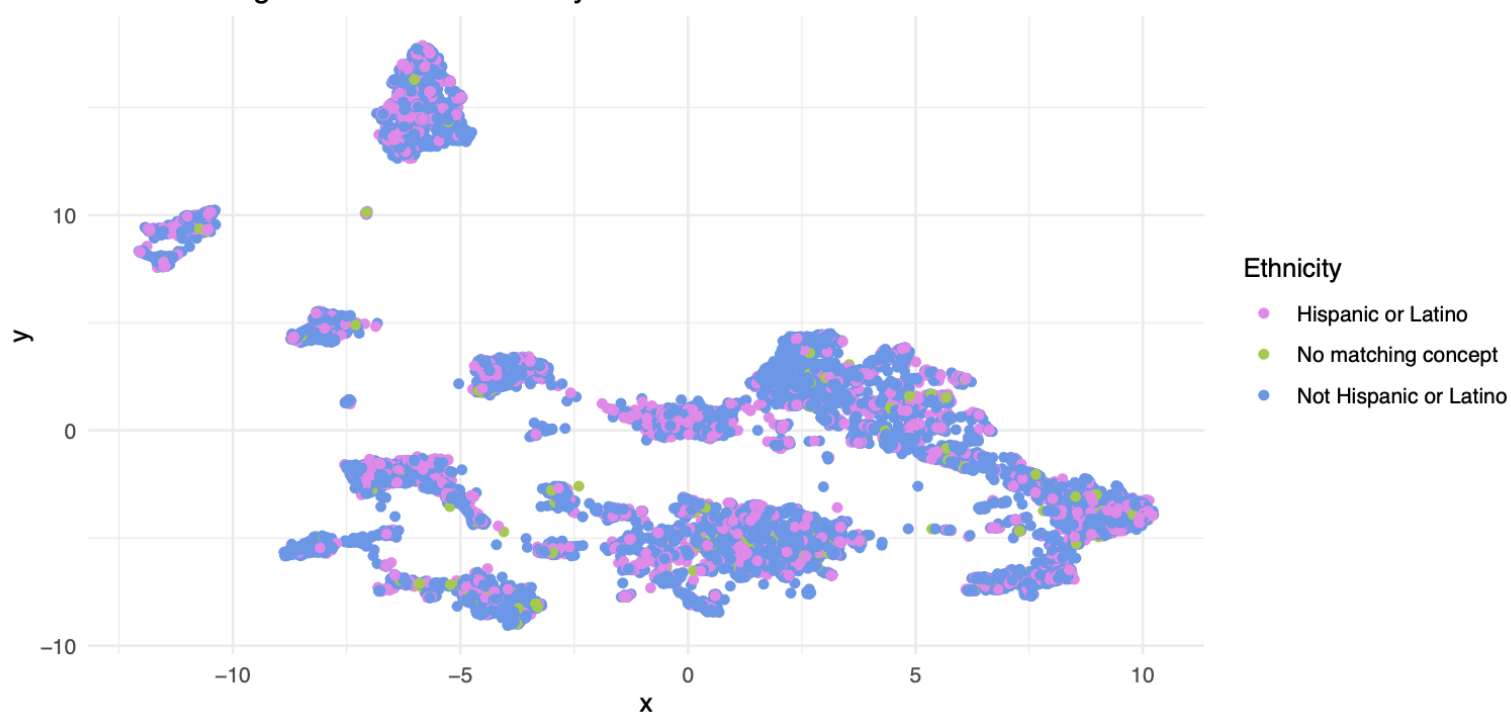

Supplementary Figure 4: Stanford diagnosis UMAPs colored by: **(a)** race and **(b)** ethnicity.

Stanford diagnosis UMAP – number of visits

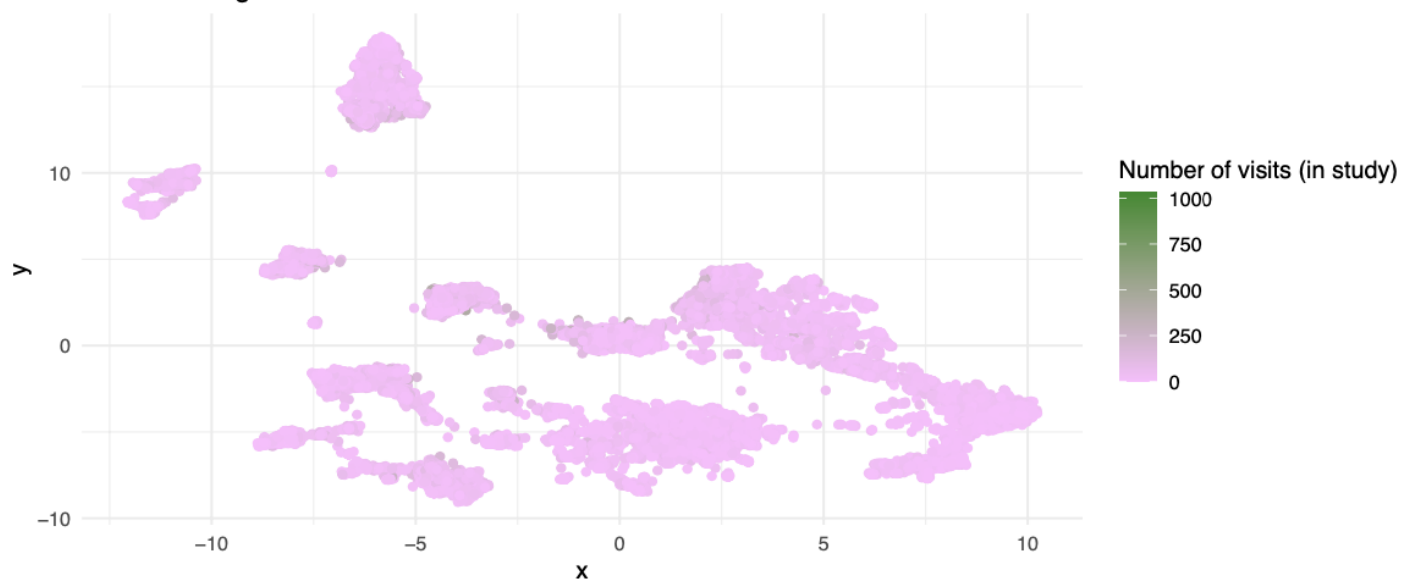

Stanford diagnosis UMAP – years in EHR

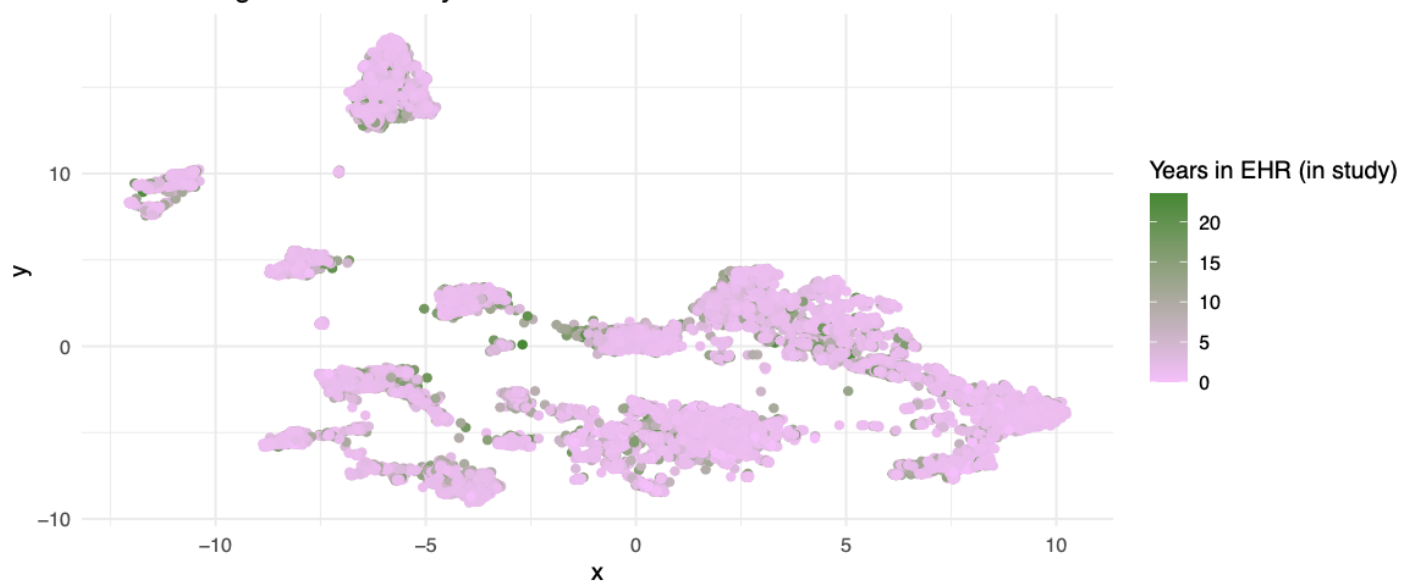

Stanford diagnosis UMAP – number of diagnoses

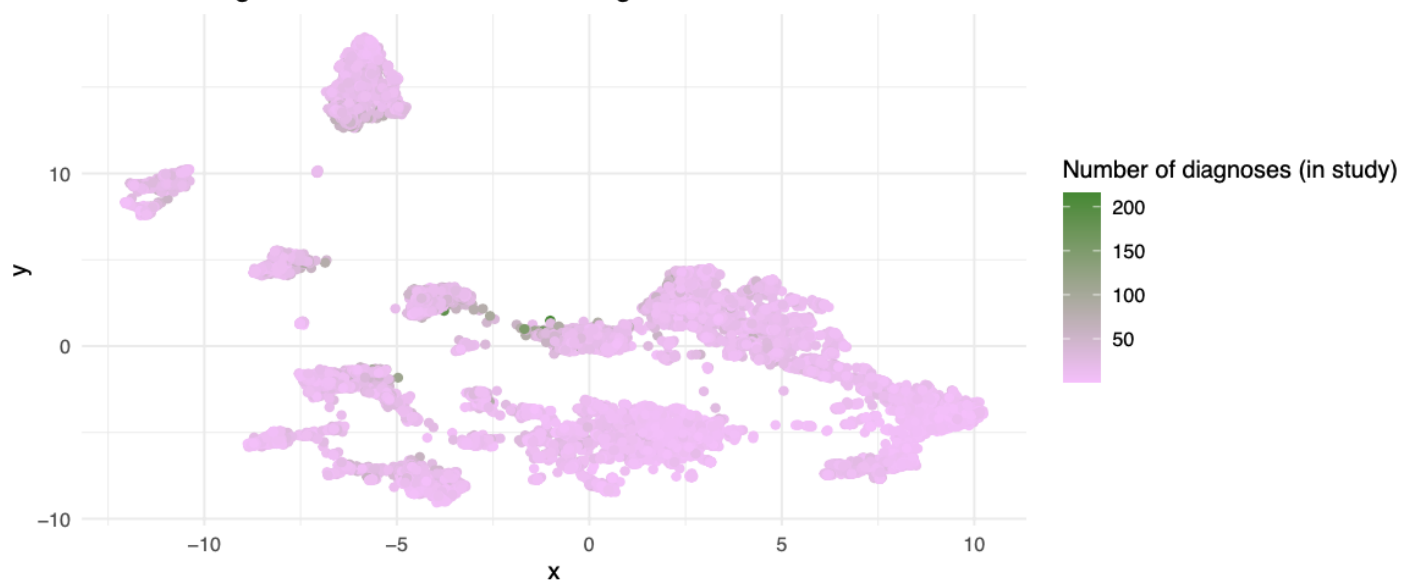

Supplementary Figure 5: Stanford diagnosis UMAPs colored by: **(a)** years in EHR, **(b)** number of visits, and **(c)** number of diagnoses.

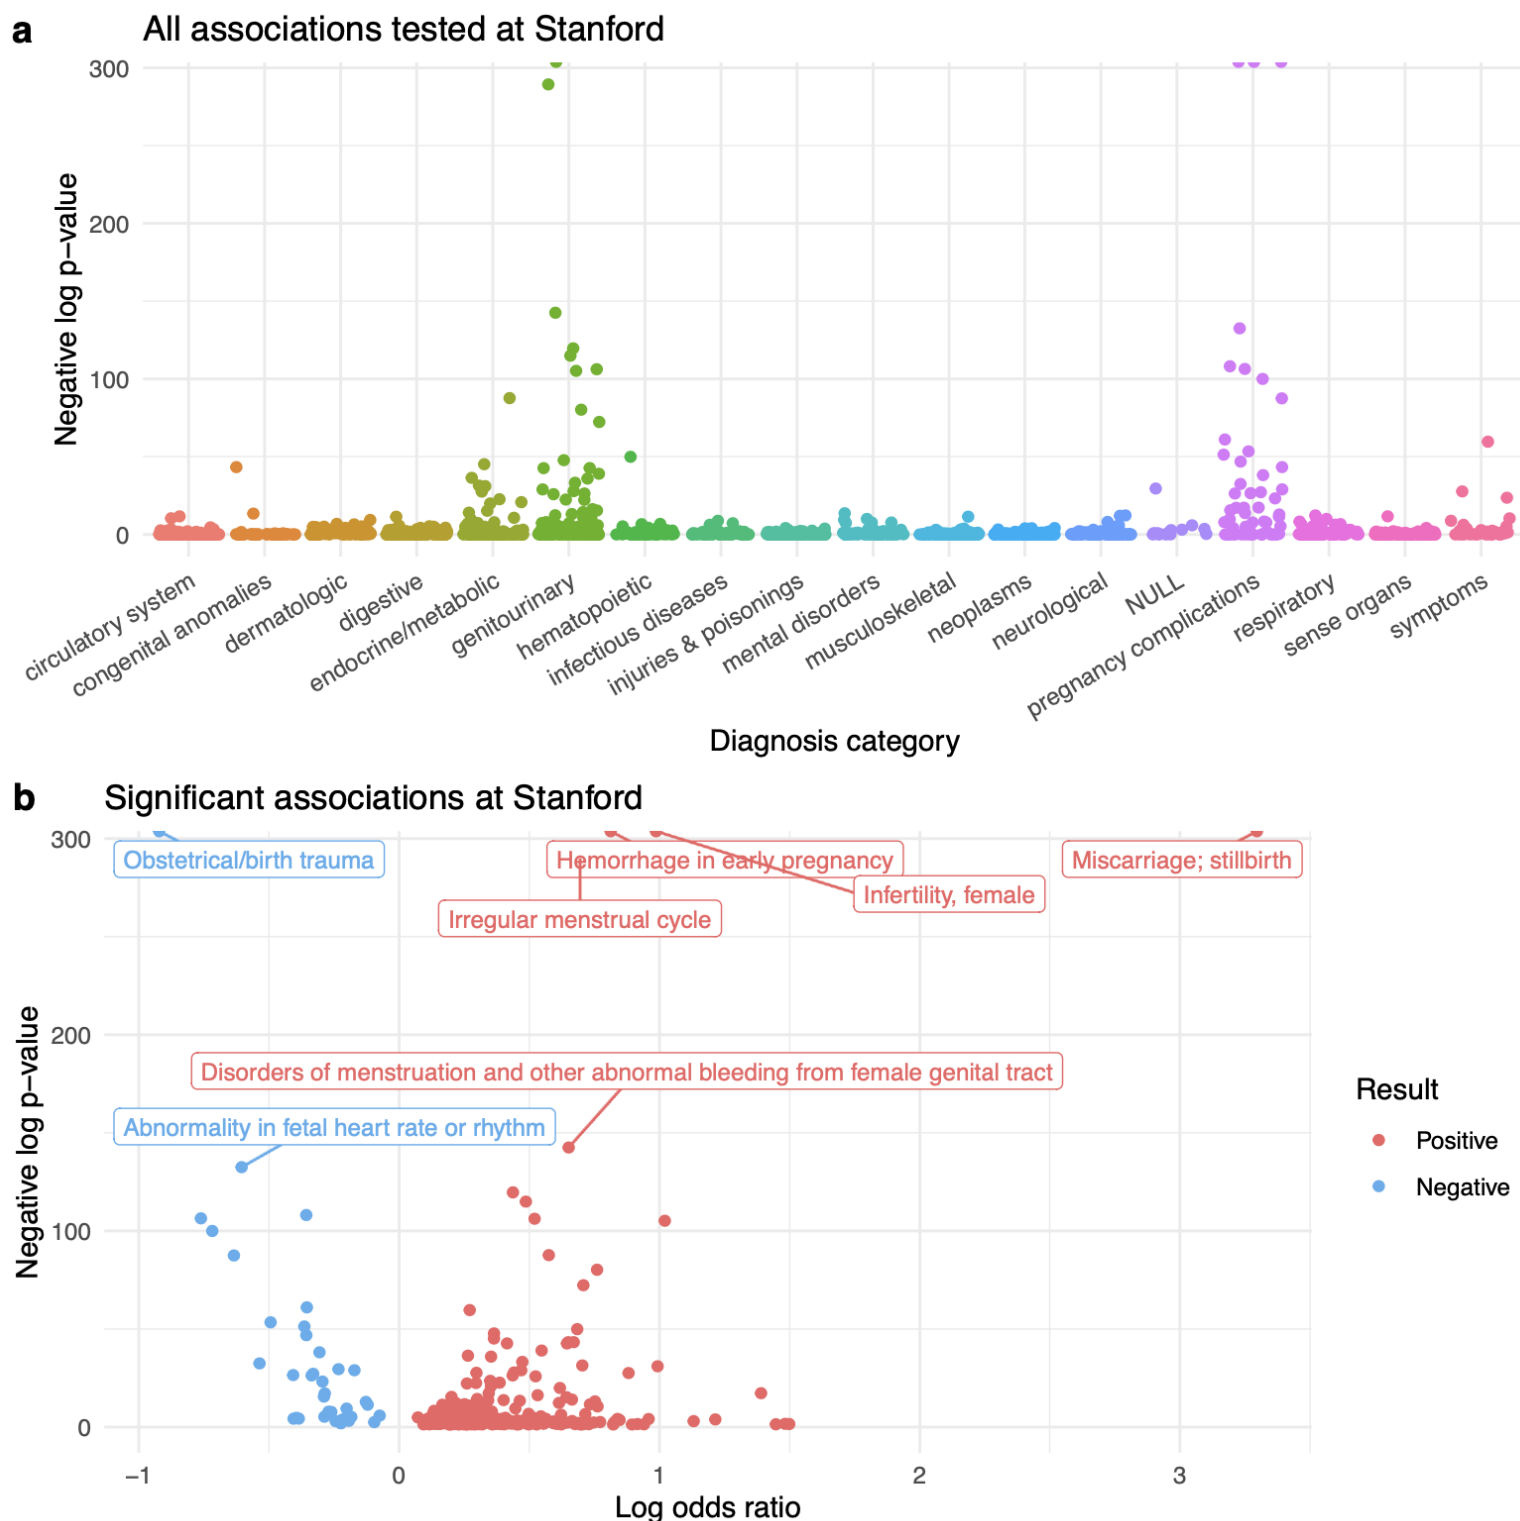

Supplementary Figure 6: Stanford association analysis results. (a) Manhattan plot of all diagnoses tested in the UCSF analysis. Diagnosis categories are listed on the x-axis. The y-axis is the negative log of each associations' p-value, from each diagnosis's GAM. (b) Volcano plot of significant ( $p\text{-value} < 0.05$ ) associations. In the Manhattan and Volcano plots, a few diagnoses have negative log p-values that are approaching infinity, so their corresponding points are located on the top border of the plot. All log transformations in these plots are in base 10.

## Significant associations by age strata at Stanford (zoomed out)

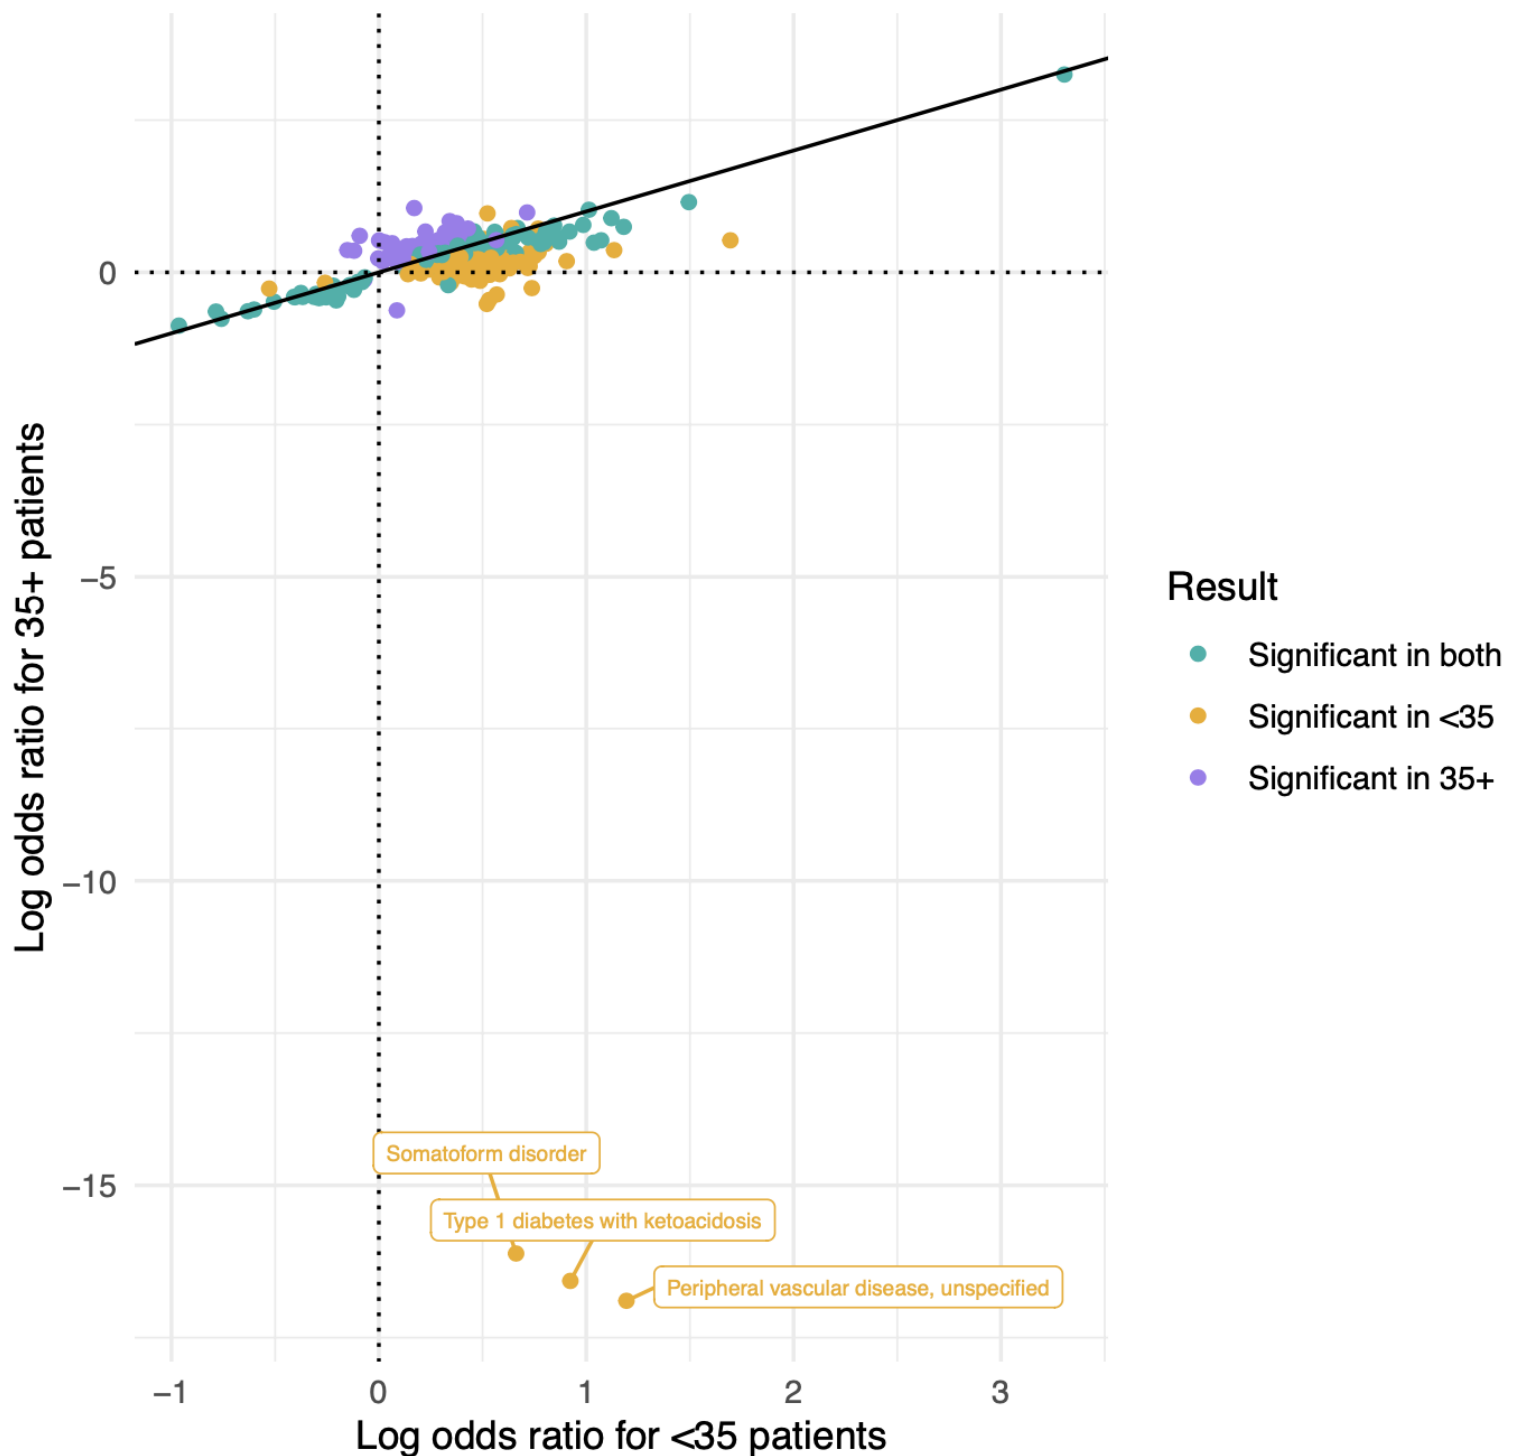

Supplementary Figure 7: Full Log-Log plot from age-stratified analysis at Stanford. The zoomed-in version of this plot is in Figure 5b. All points in the Log-Log plot were filtered to include diagnoses where  $\geq 10$  patients in either the RPL or Control group have a record of that diagnosis. All log transformations in these plots are in base 10.
